# Supplementary material for: Spatial differentiation of gene expression in Aspergillus niger colony grown for sugar beet pulp utilization
Source: PubMed Central journal article supplement (PMC4552001; doi:10.1038/srep13592), 2015-08-28
Supplement: srep13592-s1.pdf [file srep13592-s1.pdf]

## Supplementary information for

### Spatial differentiation of gene expression in *Aspergillus niger* colony grown for sugar beet pulp utilization

Isabelle Benoit<sup>1,2,3\*,+</sup>, Miaomiao Zhou<sup>1,3,+</sup>, Alexandra Vivas Duarte<sup>1,2,3</sup>, Damien J. Downes<sup>4</sup>, Richard B. Todd<sup>4</sup>, Wendy Kloezen<sup>2</sup>, Harm Post<sup>5</sup>, Albert J. R. Heck<sup>5</sup>, A. F. Maarten Altelaar<sup>5</sup>, Ronald P. de Vries<sup>1,3</sup>

<sup>1</sup>Fungal Physiology, CBS-KNAW Fungal Biodiversity Centre, Uppsalalaan 8, 3584 CT Utrecht, The Netherlands.

<sup>2</sup>Microbiology & Kluyver Centre for Genomics of Industrial Fermentations, Utrecht University, Padualaan 8, 3584 CH, Utrecht, The Netherlands.

<sup>3</sup>Fungal Molecular Physiology, Utrecht University, Utrecht, The Netherlands.

<sup>4</sup>Department of Plant Pathology, Kansas State University, 4024 Throckmorton Plant Sciences Center, Manhattan, KS 66506, USA.

<sup>5</sup>Biomolecular Mass Spectrometry and Proteomics, Bijvoet Centre for Biomolecular Research and Utrecht Institute for Pharmaceutical Sciences, Utrecht University, Padualaan 8, 3584 CH Utrecht, The Netherlands.

For correspondence: [i.benoit@cbs.knaw.nl](mailto:i.benoit@cbs.knaw.nl)

Figure S1: Ring plate. Ring plate system containing minimum medium for *Aspergillus* and 1% sugar beet pulp. A porous polycarbonate membrane (diameter 76 mm, thickness 5–10  $\mu\text{m}$ ,  $6 \times 10^8$  pores  $\text{cm}^{-2}$ , pore size 0.1  $\mu\text{m}$ ; GEOsonics, USA) was placed on top of the ring plate and 1.5  $\mu\text{l}$  of spore suspension ( $10^8$  spores  $\mu\text{l}^{-1}$ ) of *A. niger* strain N402 (Bos et al., 1988) was inoculated in the center. After 12h, a second polycarbonate membrane was placed on top of the first membrane to prevent sporulation (A). After 5 days of growth, the mycelium and the culture medium of each ring were harvested (B, C).

Figure S1: Genome scale PCA analysis with gene expression of the five zones.

Figure S2: Distribution of differentially expressed genes.

Table S1: Differentially expressed genes through the five zones.

Table S2: Expression of genes involved in central sugar metabolism of *A. niger*. The significantly differentially expression are marked out, the ones that are higher expressed in periphery are marked red with an asterisk (\*), and the ones are higher in centre are marked green with asterisk (\*). Cutoff values: fold change  $>2$ , P-value  $< 0.05$ .

Table S3. Nitrogen metabolism, nitrogen transport and autophagy genes.

Table S4: Secreted protein profile through the five zones.

**Figure S1: Ring plate.**

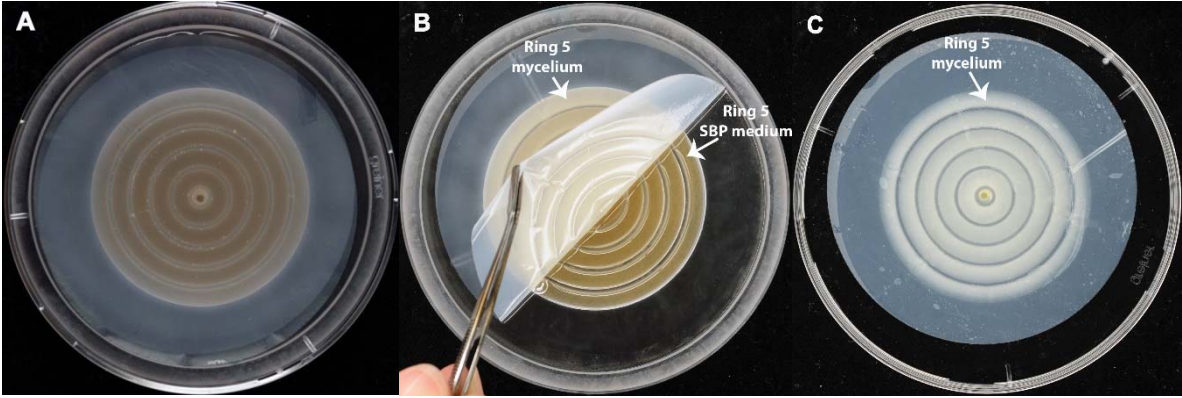

**Figure S2: Genome scale PCA analysis with gene expression of the 5 zones.**

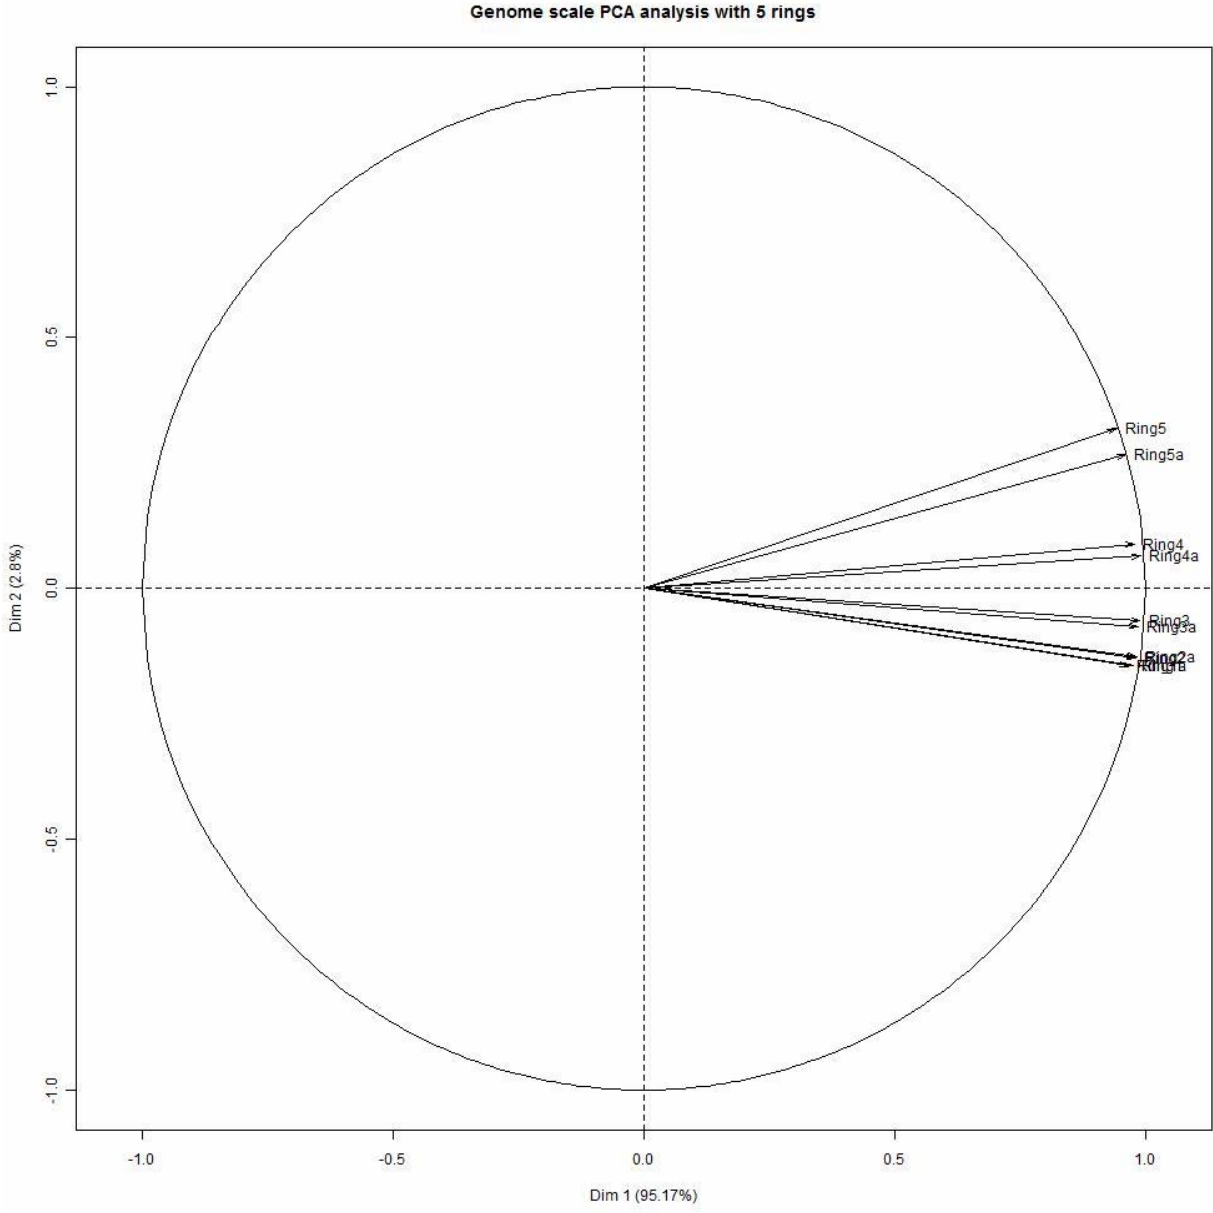

**Figure S3: Distribution of differentially expressed genes.**

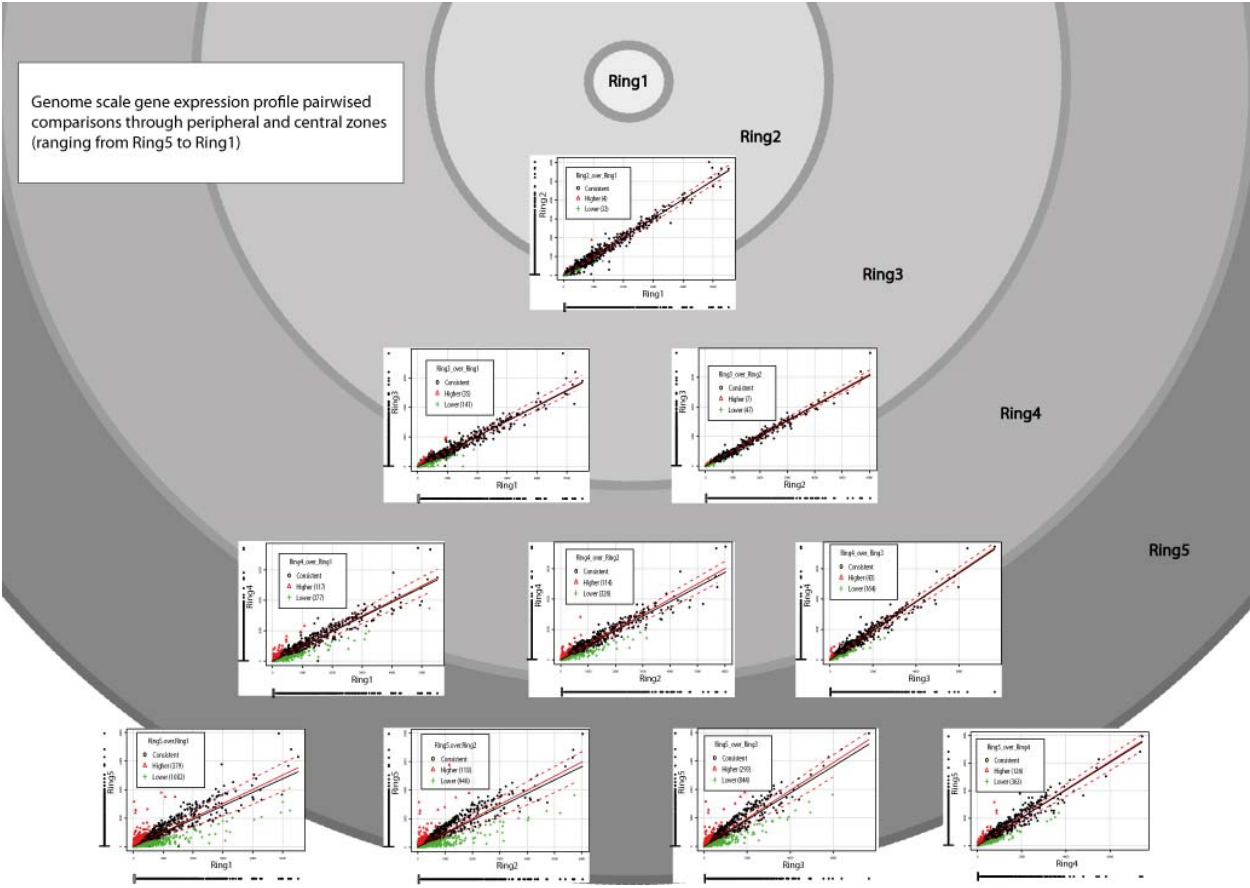

**Table S3. Nitrogen metabolism, nitrogen transport and autophagy genes.**

| UniquelD                                             | Annotation                                                                                                                                                                                                     | Fold change R5 over R1 |
|------------------------------------------------------|----------------------------------------------------------------------------------------------------------------------------------------------------------------------------------------------------------------|------------------------|
| <b>Higher expression at the centre of the colony</b> |                                                                                                                                                                                                                |                        |
| An17g00910                                           | Gamma-aminobutyrate transaminase                                                                                                                                                                               | 0.363                  |
| An15g02590                                           | Has domain(s) with predicted aminomethyltransferase activity, oxidoreductase activity, role in glycine catabolic process, oxidation-reduction process and cytoplasm localization                               | 0.416                  |
| An02g08270                                           | Has domain(s) with predicted oxidoreductase activity and role in oxidation-reduction process                                                                                                                   | 0.432                  |
| An01g13810                                           | Urea carboxylase                                                                                                                                                                                               | 0.444                  |
| An11g02200                                           | Putative 4-hydroxyphenylpyruvate dioxygenase                                                                                                                                                                   | 0.457                  |
| An14g02460                                           | Flavo-hemoglobin <i>fhbA</i>                                                                                                                                                                                   | 0.484                  |
| An02g06030                                           | Urate oxidase <i>uaZ</i>                                                                                                                                                                                       | 0.487                  |
| An01g12090                                           | Putative benzonitrilase                                                                                                                                                                                        | 0.518                  |
| An04g03890                                           | Ortholog(s) have role in purine nucleobase catabolic process                                                                                                                                                   | 0.567                  |
| An07g09920                                           | Glutamate synthase (NADH)                                                                                                                                                                                      | 0.576                  |
| An03g06870                                           | Cytidine deaminase                                                                                                                                                                                             | 0.580                  |
| An11g02180                                           | Ortholog(s) have homogentisate 1,2-dioxygenase activity and role in L-phenylalanine catabolic process, tyrosine catabolic process                                                                              | 0.596                  |
| An01g12570                                           | Putative histidine biosynthesis trifunctional protein; induced by growth on starch and lactate                                                                                                                 | 0.636                  |
| An01g01530                                           | Proline dehydrogenase                                                                                                                                                                                          | 0.651                  |
| An04g07200                                           | Putative kynureninase                                                                                                                                                                                          | 0.645                  |
| An01g14100                                           | Putative ERAD component <i>mifA</i>                                                                                                                                                                            | 0.635                  |
| An13g01860                                           | Has domain(s) with predicted amino acid transmembrane transporter activity, role in amino acid transmembrane transport and membrane localization                                                               | 0.276                  |
| An13g00840                                           | Ortholog(s) have L-lysine transmembrane transporter activity, L-proline transmembrane transporter activity, arginine transmembrane transporter activity, polyamine transmembrane transporter activity          | 0.456                  |
| An15g01900                                           | Has domain(s) with predicted amino acid transmembrane transporter activity, role in amino acid transmembrane transport and membrane localization                                                               | 0.448                  |
| An16g07900                                           | Has domain(s) with predicted amino acid transmembrane transporter activity, role in amino acid transmembrane transport and membrane localization                                                               | 0.494                  |
| An12g10000                                           | Putative GABA permease <i>gabA</i>                                                                                                                                                                             | 0.530                  |
| An03g00430                                           | Has domain(s) with predicted amino acid transmembrane transporter activity, role in amino acid transmembrane transport and membrane localization                                                               | 0.631                  |
| An02g14410                                           | Putative ammonium transport protein                                                                                                                                                                            | 0.577                  |
| An14g01850                                           | Ortholog(s) have gamma-aminobutyric acid:proton symporter activity, putrescine transmembrane transporter activity and role in gamma-aminobutyric acid transport, putrescine transport, transmembrane transport | 0.493                  |
| An15g00330                                           | Has domain(s) with predicted amino acid transmembrane transporter activity, role in amino acid transmembrane transport and membrane localization                                                               | 0.653                  |

|                                                         |                                                                                                                                                                                                                                            |       |
|---------------------------------------------------------|--------------------------------------------------------------------------------------------------------------------------------------------------------------------------------------------------------------------------------------------|-------|
| An07g08980                                              | Ortholog(s) have 1-phosphatidylinositol-3-phosphate 5-kinase activity, phosphatidylinositol-3-phosphate binding activity                                                                                                                   | 0.449 |
| An04g09220                                              | Ortholog(s) have protein kinase regulator activity                                                                                                                                                                                         | 0.503 |
| An04g03950                                              | Autophagy-related serine/threonine kinase; essential for autophagy <i>atg1</i>                                                                                                                                                             | 0.541 |
| An07g10020                                              | Putative autophagy-related ubiquitin modifier; autophagosomal membrane protein; essential for autophagy <i>atg8</i>                                                                                                                        | 0.642 |
| An11g11320                                              | Cysteine protease; predicted role in autophagic vacuole assembly <i>atg4</i>                                                                                                                                                               | 0.536 |
| An03g02660                                              | Ortholog(s) have ubiquitin-protein transferase activity and role in protein ubiquitination, ubiquitin-dependent protein catabolic process via the multivesicular body sorting pathway                                                      | 0.566 |
| An08g01060                                              | Ortholog(s) have phosphatidylinositol binding, ubiquitin binding, ubiquitin-protein transferase activity                                                                                                                                   | 0.611 |
| <b>Higher expression at the periphery of the colony</b> |                                                                                                                                                                                                                                            |       |
| An11g06590                                              | Ortholog(s) have 2-hexaprenyl-6-methoxy-1,4-benzoquinone methyltransferase activity                                                                                                                                                        | 1.555 |
| An04g05860                                              | Ribose-phosphate pyrophosphokinase                                                                                                                                                                                                         | 1.576 |
| An12g00410                                              | Ortholog(s) have mRNA binding activity, role in arginine catabolic process, positive regulation of cellular response to oxidative stress, positive regulation of nuclear-transcribed mRNA poly(A) tail shortening and cytosol localization | 1.586 |
| An01g07510                                              | Putative benzonitrilase                                                                                                                                                                                                                    | 1.602 |
| An04g04130                                              | Ornithine transaminase                                                                                                                                                                                                                     | 1.642 |
| An04g05260                                              | Saccharopine dehydrogenase (NADP+, L-glutamate forming)                                                                                                                                                                                    | 1.650 |
| An08g03070                                              | Aminomethyltransferase                                                                                                                                                                                                                     | 1.679 |
| An01g06560                                              | Argininosuccinate lyase                                                                                                                                                                                                                    | 1.717 |
| An02g14520                                              | GMP synthase                                                                                                                                                                                                                               | 1.718 |
| An08g04390                                              | Ortholog(s) have glycine dehydrogenase (decarboxylating) activity, role in glycine catabolic process, one-carbon metabolic process, protein lipoylation and mitochondrion localization                                                     | 1.718 |
| An04g00430                                              | Branched chain amino acid aminotransferase                                                                                                                                                                                                 | 1.786 |
| An02g08430                                              | Ortholog(s) have histone-arginine N-methyltransferase activity, ribosome binding activity and role in peptidyl-arginine methylation, to asymmetrical-dimethyl arginine, ribosome biogenesis                                                | 1.792 |
| An11g06820                                              | 3'-5' bisphosphate nucleotidase                                                                                                                                                                                                            | 1.806 |
| An08g05640                                              | Putative nitrite reductase <i>niiA</i>                                                                                                                                                                                                     | 1.812 |
| An02g01610                                              | Ortholog(s) have urease activity, role in urea catabolic process and cytosol, nucleus localization                                                                                                                                         | 1.812 |
| An17g01640                                              | 1-(5-phosphoribosyl)-5-[(5-phosphoribosylamino)methylideneamino]imidazole-4-carboxamide isomerase                                                                                                                                          | 1.856 |
| An13g01080                                              | ATP phosphoribosyltransferase                                                                                                                                                                                                              | 1.903 |
| An11g04730                                              | Prolyl amino peptidase involved in protein degradation; removes N-terminal proline and hydroxyproline residues from peptides <i>papA</i>                                                                                                   | 1.924 |
| An02g13740                                              | Putative Gly-X carboxypeptidase precursor                                                                                                                                                                                                  | 1.980 |
| An15g02490                                              | Ortholog(s) have NAD binding, homoisocitrate dehydrogenase activity, role in lysine biosynthetic                                                                                                                                           | 2.023 |

|            |                                                                                                                                                                                                                               |       |
|------------|-------------------------------------------------------------------------------------------------------------------------------------------------------------------------------------------------------------------------------|-------|
|            | process and mitochondrion localization                                                                                                                                                                                        |       |
| An02g10750 | Cysteine synthase                                                                                                                                                                                                             | 2.036 |
| An01g11930 | Histidinol-phosphate aminotransferase                                                                                                                                                                                         | 2.235 |
| An02g14660 | Ortholog(s) have 90S preribosome, nucleolus, spindle localization                                                                                                                                                             | 2.278 |
| An04g02800 | Pyrroline-5-carboxylate reductase                                                                                                                                                                                             | 2.360 |
| An02g07500 | Saccharopine dehydrogenase <i>lys1</i>                                                                                                                                                                                        | 2.629 |
| An11g09780 | PAPS reductase                                                                                                                                                                                                                | 2.752 |
| An08g02990 | Adenylylsulfate kinase                                                                                                                                                                                                        | 4.440 |
| An04g01340 | Putative asparagine synthase                                                                                                                                                                                                  | 5.157 |
| An08g05610 | Nitrate reductase <i>niaD</i>                                                                                                                                                                                                 | 6.398 |
| An02g06150 | Branched chain amino acid aminotransferase                                                                                                                                                                                    | 7.111 |
| An01g14960 | Asparaginase                                                                                                                                                                                                                  | 2.486 |
| An16g02520 | Threonine synthase                                                                                                                                                                                                            | 1.558 |
| An08g06240 | Protein with similarity to uracil transport protein FUR4 of <i>Schizosaccharomyces pombe</i>                                                                                                                                  | 1.710 |
| An14g02590 | Has domain(s) with predicted amino acid transmembrane transporter activity, role in amino acid transmembrane transport and membrane localization                                                                              | 5.159 |
| An04g00530 | Ortholog(s) have role in positive regulation of (R)-carnitine transmembrane transport, positive regulation of polyamine transmembrane transport                                                                               | 3.142 |
| An16g01920 | Has domain(s) with predicted amino acid transmembrane transporter activity, role in amino acid transmembrane transport and membrane localization                                                                              | 2.160 |
| An16g06090 | Has domain(s) with predicted amino acid transmembrane transporter activity, role in amino acid transmembrane transport and membrane localization                                                                              | 2.171 |
| An02g09790 | Ortholog(s) have thiamine transmembrane transporter activity, role in thiamine transmembrane transport and endoplasmic reticulum, plasma membrane localization                                                                | 1.788 |
| An08g03200 | Ortholog(s) have high-affinity secondary active ammonium transmembrane transporter activity, methylammonium transmembrane transporter activity                                                                                | 1.811 |
| An07g03070 | Ortholog(s) have L-aspartate transmembrane transporter activity, L-glutamate transmembrane transporter activity, antiporter activity, uniporter activity                                                                      | 3.012 |
| An11g06150 | Ortholog(s) have L-proline transmembrane transporter activity, role in proline transport and Golgi apparatus, endoplasmic reticulum, fungal-type vacuole, plasma membrane localization                                        | 4.503 |
| An08g05670 | Putative nitrate transporter <i>crnA</i>                                                                                                                                                                                      | 9.182 |
| An15g04600 | Putative sulfate permease                                                                                                                                                                                                     | 2.226 |
| An01g03790 | Ortholog(s) have putrescine transmembrane transporter activity, spermidine transmembrane transporter activity, urea transmembrane transporter activity and role in putrescine transport, spermidine transport, urea transport | 1.648 |
